# Supplementary material
Source: HighWire-hosted journal article supplement (https://www.cmaj.ca/content/suppl/2006/05/10/174.1.56)
Supplement: diet-strychar-1-at.pdf [file diet-strychar-1-at.pdf]

**e-Appendix:** Weight-loss dietary regimens for a low-calorie diet, low-carbohydrate diet and very-low-fat diet as calculated for a sedentary woman, 45 years of age with a body mass index of 31 kg/m<sup>2</sup> (weight = 87.5 kg [192.5 lbs], height = 167.6 cm [5'6"])\*

| Low-calorie diet     |                        |                  | Calorie-reduced low-carbohydrate diet |                        |                 | Calorie-reduced very-low-fat diet |                        |                  |
|----------------------|------------------------|------------------|---------------------------------------|------------------------|-----------------|-----------------------------------|------------------------|------------------|
| Choicest†            | Foods                  | Amount           | Choices                               | Foods                  | Amount          | Choices                           | Foods                  | Amount           |
|                      | <b>Breakfast</b>       |                  |                                       | <b>Breakfast</b>       |                 |                                   | <b>Breakfast</b>       |                  |
| 1 grain product      | Bran flakes            | ¾ cup            | 2 meat & alternatives                 | Extra large egg        | 2               | 2 grain products                  | All Bran cereal        | ¾ cup            |
| 1 milk product       | cereal                 | 1 cup            | 1 fat                                 | Butter                 | 1 tsp           | 1 milk product                    | Milk, skim             | 1 cup            |
| ½ fruit              | Milk, 1%               | 1/2              | 1 fat                                 | Bacon (medium slice)   | 2               | ½ fruit                           | Banana                 | 1/2              |
|                      | <b>Lunch</b>           |                  |                                       | <b>Lunch</b>           | 4 oz            |                                   | <b>Lunch</b>           |                  |
|                      | <u>Tuna sandwich:</u>  | 2                | 1½ meat & alternatives                | Ham (regular)          | 1 Tbsp          |                                   | <u>Tuna sandwich:</u>  |                  |
| 2 grain products     | Whole wheat toast      | 2 oz             | 3 fat                                 | Regular mayonnaise     | 10              | 2 grain products                  | Whole wheat toast      | 2                |
| 1 meat & alternative | Tuna                   | leaves           | 1 vegetable                           | Baby carrots           |                 | 1 meat & alternative              | Tuna                   | 2                |
| ¼ vegetable          | canned/water           | 2 tsp            |                                       |                        |                 | ¼ vegetable                       | canned/water           | leaves           |
| 2 fat                | Romaine                | 10               |                                       |                        |                 | 1 vegetable                       | Romaine                | 10               |
| 1 vegetable          | lettuce                | ½ cup            |                                       |                        |                 | 1 fruit                           | lettuce                | ½ cup            |
| 1 fruit              | Regular mayonnaise     |                  |                                       |                        |                 |                                   | Baby carrots           |                  |
|                      | Baby carrots           |                  |                                       |                        | 6 oz            |                                   | Fruits canned in juice | (no sugar added) |
|                      | Fruits canned in juice | 3 oz             |                                       | <b>Dinner</b>          | 1 cup           |                                   |                        | 2 oz             |
| 1 meat & alternative | (no sugar added)       | 2/3 cup          | 2 meat & alternatives                 | Chicken breast roasted | 1 Tbsp          | 1 meat & alternative              |                        | 1½ cup           |
| 1½ grain product     |                        | 1 tsp            | 1 vegetable                           | Lettuce                |                 | 3 grain products                  | <b>Dinner</b>          | 1 cup            |
| 2 vegetable          | Chicken breast         | 1 cup            | 3 fat                                 | Olive oil              |                 | 2 vegetables                      | Chicken breast roasted | 1 cup            |
| 1 fat                | roasted                | 1 cup            |                                       |                        |                 | 1 fat                             | Brown rice             | 1 cup            |
| 1 fat                | Brown rice             |                  |                                       |                        |                 | 2 vegetables                      | cooked                 |                  |
| 2 vegetable          | cooked                 |                  |                                       |                        | 1 oz            | 2 vegetables                      | Broccoli boiled        |                  |
| 2 fruit              | Broccoli boiled        | 1 cup            |                                       |                        | 2               | 2 fruits                          | Olive oil              |                  |
|                      | Becel margarine        | 2                |                                       |                        |                 |                                   | Vegetable juice        | 1 cup            |
|                      | Olive oil              |                  | 2/3 milk product                      | <b>Evening snack</b>   |                 |                                   | Strawberries           | 2                |
| 1 milk product       | Vegetable juice        |                  | 1/3 grain product                     | Cheddar cheese         |                 | 1 milk product                    |                        |                  |
| ½ grain product      | Strawberries           |                  |                                       | Cracker, Saltine       |                 | ½ grain product                   | <b>Evening snack</b>   |                  |
|                      | <b>Evening snack</b>   |                  |                                       |                        |                 |                                   | Milk, skim             |                  |
|                      | Milk, 1%               |                  |                                       |                        |                 |                                   | Social tea             |                  |
|                      | Social tea             |                  |                                       |                        |                 |                                   | cookies                |                  |
|                      | cookies                |                  |                                       |                        |                 |                                   |                        |                  |
| Nutrients            | Diet                   | Recommendation ‡ | Nutrients                             | Diet                   | Recommendation‡ | Nutrients                         | Diet                   | Recommendation‡  |

|                        |         |      |                        |       |      |                        |      |      |
|------------------------|---------|------|------------------------|-------|------|------------------------|------|------|
| Calories, kcal         | 1223    | 1902 | Calories, kcal         | 1236  | 1902 | Calories, kcal         | 1243 | 1902 |
| Carbohydrates, %       | 54      | -    | Carbohydrates, %       | 7     | -    | Carbohydrates, %       | 66   | -    |
| Proteins, % (g)        | 25 (81) | (70) | Proteins, % (g)        | 34    | (70) | Proteins, % (g)        | 23   | (70) |
| Fat, %                 | 21      | -    | Fat, %                 | (104) | -    | Fat, %                 | (78) | -    |
| Saturated fat, %       | 4.9     | -    | Saturated fat, %       | 59    | -    | Saturated fat, %       | 11   | -    |
| Monounsaturated fat, % | 8.6     | -    | Monounsaturated fat, % | 21    | -    | Monounsaturated fat, % | 2.1  | -    |
| Polyunsaturated fat, % | 4.7     | -    | Polyunsaturated fat, % | 32    | -    | Polyunsaturated fat, % | 3.9  | -    |
| Cholesterol, mg        | 114     | -    | Cholesterol, mg        | 9     | -    | Cholesterol, mg        | 2.0  | -    |
| Dietary fibre, g       | 22      | 25   | Dietary fibre, g       | 763   | 25   | Dietary fibre, g       | 74   | 25   |
| Calcium, mg            | 851     | 1000 | Calcium, mg            | 3     | 1000 | Calcium, mg            | 38   | 1000 |
| Iron, mg               | 11.4    | 18   | Iron, mg               | 295   | 18   | Iron, mg               | 898  | 18   |
| Vitamin C, mg          | 313     | 75   | Vitamin C, mg          | 6.4   | 75   | Vitamin C, mg          | 15.5 | 75   |
| Folic acid, mcg        | 312     | 400  | Folic acid, mcg        | 22    | 400  | Folic acid, mcg        | 317  | 400  |
|                        |         |      |                        | 183   |      |                        | 342  |      |

\* Nutrient analyses conducted with The Food Processor SQL, *esha* RESEARCH, Salem, Oregon, using the 2001 Canadian Nutrient File.

† Based on minimum portions and portion sizes from Canada's Food Guide to Healthy Eating.

‡ Based on Dietary Reference Intakes; energy requirements calculated using the Harris-Benedict equation.
